# Supplementary material
Source: Research Square preprint supplement (doi:10.21203/rs.3.rs-8996712/v1)
Supplement: Supplementary file 1 [file 03fbc19ad13fd48d0fdc2270.pdf]

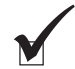

| Topic                               | Item | Checklist item description                                                                             | Reported on Line                                                    |
|-------------------------------------|------|--------------------------------------------------------------------------------------------------------|---------------------------------------------------------------------|
| <b>Title</b>                        | 1    | The diagnosis or intervention of primary focus followed by the words “case report”                     | 2                                                                   |
| <b>Key Words</b>                    | 2    | 2 to 5 key words that identify diagnoses or interventions in this case report, including "case report" | 51-52                                                               |
| <b>Abstract<br/>(no references)</b> | 3a   | Introduction: What is unique about this case and what does it add to the scientific literature?        | 53                                                                  |
|                                     | 3b   | Main symptoms and/or important clinical findings                                                       | 78-81                                                               |
|                                     | 3c   | The main diagnoses, therapeutic interventions, and outcomes                                            | 124-147                                                             |
|                                     | 3d   | Conclusion—What is the main “take-away” lesson(s) from this case?                                      | 45-48                                                               |
| <b>Introduction</b>                 | 4    | One or two paragraphs summarizing why this case is unique ( <b>may include references</b> )            | 42-45                                                               |
| <b>Patient Information</b>          | 5a   | De-identified patient specific information.                                                            | 85                                                                  |
|                                     | 5b   | Primary concerns and symptoms of the patient.                                                          | 95-114                                                              |
|                                     | 5c   | Medical, family, and psycho-social history including relevant genetic information                      | 89                                                                  |
|                                     | 5d   | Relevant past interventions with outcomes                                                              | 86                                                                  |
| <b>Clinical Findings</b>            | 6    | Describe significant physical examination (PE) and important clinical findings.                        | 91-94                                                               |
| <b>Timeline</b>                     | 7    | Historical and current information from this episode of care organized as a timeline                   | 87-124                                                              |
| <b>Diagnostic Assessment</b>        | 8a   | Diagnostic testing (such as PE, laboratory testing, imaging, surveys).                                 | 124-126                                                             |
|                                     | 8b   | Diagnostic challenges (such as access to testing, financial, or cultural)                              | 114-116                                                             |
|                                     | 8c   | Diagnosis (including other diagnoses considered)                                                       | 123-129                                                             |
|                                     | 8d   | Prognosis (such as staging in oncology) where applicable                                               | N/A                                                                 |
| <b>Therapeutic Intervention</b>     | 9a   | Types of therapeutic intervention (such as pharmacologic, surgical, preventive, self-care)             | 134-144                                                             |
|                                     | 9b   | Administration of therapeutic intervention (such as dosage, strength, duration)                        | 136-141                                                             |
|                                     | 9c   | Changes in therapeutic intervention (with rationale)                                                   | N/A                                                                 |
| <b>Follow-up and Outcomes</b>       | 10a  | Clinician and patient-assessed outcomes (if available)                                                 | 145-147                                                             |
|                                     | 10b  | Important follow-up diagnostic and other test results                                                  | 141-147                                                             |
|                                     | 10c  | Intervention adherence and tolerability (How was this assessed?)                                       | N/A                                                                 |
|                                     | 10d  | Adverse and unanticipated events                                                                       | N/A                                                                 |
| <b>Discussion</b>                   | 11a  | A scientific discussion of the strengths AND limitations associated with this case report              | 156-167                                                             |
|                                     | 11b  | Discussion of the relevant medical literature <b>with references</b> .                                 | 178                                                                 |
|                                     | 11c  | The scientific rationale for any conclusions (including assessment of possible causes)                 | 189-206                                                             |
|                                     | 11d  | The primary “take-away” lessons of this case report (without references) in a one paragraph conclusion | 219-223                                                             |
| <b>Patient Perspective</b>          | 12   | The patient should share their perspective in one to two paragraphs on the treatment(s) they received  | N/A                                                                 |
| <b>Informed Consent</b>             | 13   | Did the patient give informed consent? Please provide if requested                                     | Yes <input checked="" type="checkbox"/> No <input type="checkbox"/> |
